# Supplementary material for: Single-nucleus transcriptomics reveal the cytological mechanism of conjugated linoleic acids in regulating intramuscular fat deposition
Source: eLife journal article supplement (doi:10.7554/elife.99790), 2024-07-17
Supplement: fig7-data1 [file elife-99790-fig7-data1-v1.pdf]

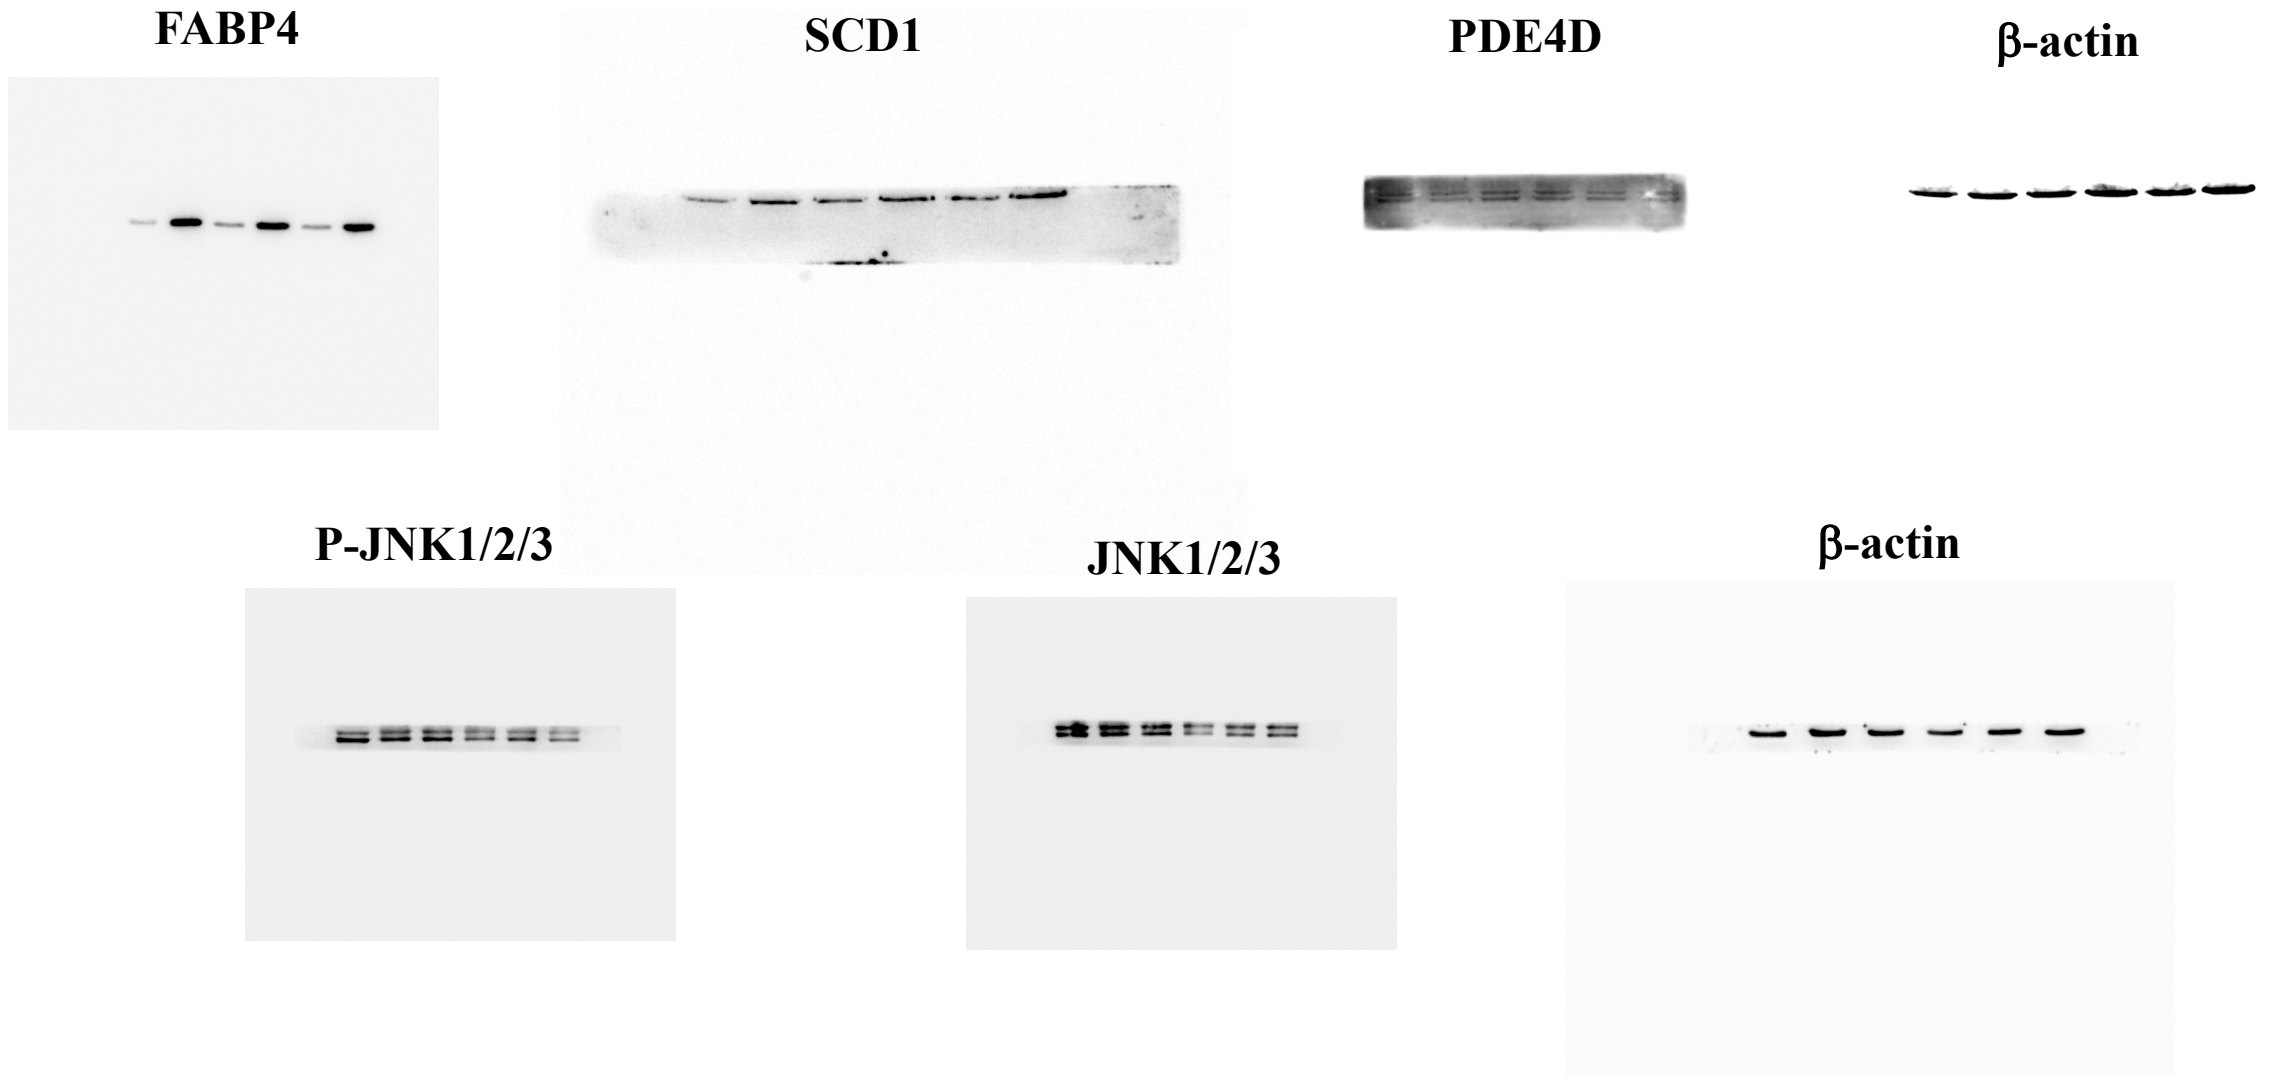

**Figure 7-Source Data 1.** Original membranes corresponding to Figure 7D and 7G. The lower membranes correspond to CON group and higher membranes correspond to CLA group.
